# Supplementary material
Source: publisher site journal article supplement (https://www.dovepress.com/article/393881)
Supplement: Supplementary file 1 [file get_supplementary_file.php]

# Supplemental Appendix A

## Supplemental Appendix A, Table 1. Diagnosis Code for Complications

| **Complication** | **Code type** | **Code** | **Code description** | **Procedure type specification** |
| --- | --- | --- | --- | --- |
| **Bleeding** | ICD-10-CM | D62 | Acute posthemorrhagic anemia | For general and thoracic procedures |
| **Bleeding** | ICD-10-CM | D78.0X | Intraoperative hemorrhage and hematoma of the spleen complicating a procedure | For general procedures only |
| **Bleeding** | ICD-10-CM | D78.2X | Postprocedural hemorrhage of the spleen following a procedure | For general procedures only |
| **Bleeding** | ICD-10-CM | D78.31 | Postprocedural hematoma of the spleen following a procedure on the spleen | For general procedures only |
| **Bleeding** | ICD-10-CM | D78.32 | Postprocedural hematoma of the spleen following other procedure | For general procedures only |
| **Bleeding** | ICD-10-CM | I97.41X | Intraoperative hemorrhage and hematoma of a circulatory system organ or structure complicating a procedure | For thoracic procedures only |
| **Bleeding** | ICD-10-CM | I97.42 | Intraoperative hemorrhage and hematoma of a circulatory system organ or structure complicating other procedure | For thoracic procedures only |
| **Bleeding** | ICD-10-CM | I97.61X | Postprocedural hemorrhage of a circulatory system organ or structure following a circulatory system procedure | For thoracic procedures only |
| **Bleeding** | ICD-10-CM | I97.620 | Postprocedural hemorrhage of a circulatory system organ or structure following other procedure | For thoracic procedures only |
| **Bleeding** | ICD-10-CM | I97.621 | Postprocedural hematoma of a circulatory system organ or structure following other procedure | For thoracic procedures only |
| **Bleeding** | ICD-10-CM | I97.63X | Postprocedural hematoma of a circulatory system organ or structure following a circulatory system procedure | For thoracic procedures only |
| **Bleeding** | ICD-10-CM | J95.6X | Intraoperative hemorrhage and hematoma of a respiratory system organ or structure complicating a procedure | For thoracic procedures only |
| **Bleeding** | ICD-10-CM | J95.83X | Postprocedural hemorrhage of a respiratory system organ or structure following a procedure | For thoracic procedures only |
| **Bleeding** | ICD-10-CM | J95.860 | Postprocedural hematoma of a respiratory system organ or structure following a respiratory system procedure | For thoracic procedures only |
| **Bleeding** | ICD-10-CM | J95.861 | Postprocedural hematoma of a respiratory system organ or structure following other procedure | For thoracic procedures only |
| **Bleeding** | ICD-10-CM | K91.6X | Intraoperative hemorrhage and hematoma of a digestive system organ or structure complicating a procedure | For general procedures only |
| **Bleeding** | ICD-10-CM | K91.84X | Postprocedural hemorrhage of a digestive system organ or structure following a procedure | For general procedures only |
| **Bleeding** | ICD-10-CM | K91.870 | Postprocedural hematoma of a digestive system organ or structure following a digestive system procedure | For general procedures only |
| **Bleeding** | ICD-10-CM | K91.871 | Postprocedural hematoma of a digestive system organ or structure following other procedure | For general procedures only |
| **Bleeding** | ICD-10-CM | K92.1 | Melena | For general procedures only |
| **Bleeding** | ICD-10-CM | K92.2 | Gastrointestinal hemorrhage, unspecified | For general procedures only |
| **Bleeding** | ICD-10-CM | R04.2 | Hemoptysis | For thoracic procedures only |
| **Bleeding** | ICD-10-CM | R04.89 | Hemorrhage from other sites in respiratory passages | For thoracic procedures only |
| **Bleeding** | ICD-10-CM | R04.9 | Hemorrhage from respiratory passages, unspecified | For thoracic procedures only |
| **Bleeding** | ICD-10-CM | R58 | Hemorrhage, not elsewhere classified | For general and thoracic procedures |
| **Anastomotic Leak** | ICD-10-CM | K31.6 | Fistula of stomach and duodenum | For general procedures only |
| **Anastomotic Leak** | ICD-10-CM | K63.0 | Abscess of intestine | For general procedures only |
| **Anastomotic Leak** | ICD-10-CM | K63.2 | Fistula of intestine | For general procedures only |
| **Anastomotic Leak** | ICD-10-CM | K65.1 | Peritoneal abscess | For general procedures only |
| **Anastomotic Leak** | ICD-10-CM | K68.11 | Postprocedural retroperitoneal abscess | For general procedures only |
| **Anastomotic Leak** | ICD-10-CM | K91.3X | Postprocedural intestinal obstruction | For general procedures only |
| **Anastomotic Leak** | ICD-10-CM | K91.81 | Other intraoperative complications of digestive system | For general procedures only |
| **Anastomotic Leak** | ICD-10-CM | K91.89 | Other postprocedural complications and disorders of digestive system | For general procedures only |
| **Anastomotic Leak** | ICD-10-CM | N32.1 | Vesicointestinal fistula | For general procedures only |
| **Anastomotic Leak** | ICD-10-CM | Y83.2 | Surgical operation with anastomosis, bypass or graft as the cause of abnormal reaction of the patient, or of later complication, without mention of misadventure at the time of the procedure | For general procedures only |
| **Anastomotic Leak** | ICD-10-CM | T81.83XA | Persistent postprocedural fistula, initial encounter | For general procedures only |
| **Air Leak** | ICD-10-CM | J93.82 | Other air leak | For thoracic procedures only |
| **Air Leak** | ICD-10-CM | J93.83 | Other pneumothorax | For thoracic procedures only |
| **Air Leak** | ICD-10-CM | J93.9 | Pneumothorax, unspecified | For thoracic procedures only |
| **Air Leak** | ICD-10-CM | J95.81X | Postprocedural pneumothorax and air leak | For thoracic procedures only |
| **Sepsis** | ICD-10-CM | A40.3 | Sepsis due to Streptococcus pneumoniae | For general procedures only |
| **Sepsis** | ICD-10-CM | A40.9 | Streptococcal sepsis, unspecified | For general procedures only |
| **Sepsis** | ICD-10-CM | A41.01 | Sepsis due to Methicillin susceptible Staphylococcus aureus | For general procedures only |
| **Sepsis** | ICD-10-CM | A41.02 | Sepsis due to Methicillin resistant Staphylococcus aureus | For general procedures only |
| **Sepsis** | ICD-10-CM | A41.1 | Sepsis due to other specified staphylococcus | For general procedures only |
| **Sepsis** | ICD-10-CM | A41.2 | Sepsis due to unspecified staphylococcus | For general procedures only |
| **Sepsis** | ICD-10-CM | A41.50 | Gram-negative sepsis, unspecified | For general procedures only |
| **Sepsis** | ICD-10-CM | A41.51 | Sepsis due to Escherichia coli [E. coli] | For general procedures only |
| **Sepsis** | ICD-10-CM | A41.52 | Sepsis due to Pseudomonas | For general procedures only |
| **Sepsis** | ICD-10-CM | A41.53 | Sepsis due to Serratia | For general procedures only |
| **Sepsis** | ICD-10-CM | A41.59 | Other Gram-negative sepsis | For general procedures only |
| **Sepsis** | ICD-10-CM | A41.89 | Other specified sepsis | For general procedures only |
| **Sepsis** | ICD-10-CM | A41.9 | Sepsis, unspecified organism | For general procedures only |
| **Sepsis** | ICD-10-CM | R65.20 | Severe sepsis without septic shock | For general procedures only |
| **Sepsis** | ICD-10-CM | R65.21 | Severe sepsis with septic shock | For general procedures only |
| **Sepsis** | ICD-10-CM | R78.81 | Bacteremia | For general procedures only |
| **Sepsis** | ICD-10-CM | T81.44XA | Sepsis following a procedure, initial encounter | For general procedures only |

ICD-10-CM: International Classification of Diseases, Tenth Revision, Clinical Modification

# Supplemental Appendix B

## Supplemental Appendix B, Table 1. Patient, hospital, provider, and procedure characteristics of the general surgery cohort with an inpatient admission

|  | **Prior to Covariate Balancing** | | | | **After Covariate Balancinga** | | | |
| --- | --- | --- | --- | --- | --- | --- | --- | --- |
| **Covariate** | **Overall** | **Standard Reload** | **GST Reload** | **SMD** | **Overall** | **Standard Reload** | **GST Reload** | **SMD** |
| N | 4271 | 1651 | 2620 |  | 4271 | 1651 | 2620 |  |
| Age, mean (SD) | 54.9 (17) | 54.2 (17.1) | 55.4 (16.8) | 0.068 | 55.4 (16.8) | 55.6 (16.7) | 55.4 (16.8) | 0.010 |
| Age category, years, n (%) |  |  |  |  |  |  |  |  |
| 18-34 | 624 (14.6) | 270 (16.4) | 354 (13.5) | 0.077 | 580 (13.6) | 226 (13.7) | 354 (13.5) | 0.006 |
| 35-44 | 536 (12.5) | 190 (11.5) | 346 (13.2) | 0.053 | 528 (12.4) | 182 (11) | 346 (13.2) | 0.068 |
| 45-54 | 795 (18.6) | 298 (18) | 497 (19) | 0.024 | 813 (19) | 316 (19.2) | 497 (19) | 0.005 |
| 55-64 | 967 (22.6) | 401 (24.3) | 566 (21.6) | 0.063 | 993 (23.3) | 427 (25.9) | 566 (21.6) | 0.100 |
| 65+ | 1349 (31.6) | 492 (29.8) | 857 (32.7) | 0.064 | 1356 (31.7) | 499 (30.2) | 857 (32.7) | 0.055 |
| Sex, n (%) |  |  |  |  |  |  |  |  |
| Female | 2336 (54.7) | 872 (52.8) | 1464 (55.9) | 0.061 | 2317 (54.2) | 853 (51.6) | 1464 (55.9) | 0.085 |
| Male | 1935 (45.3) | 779 (47.2) | 1156 (44.1) | 0.061 | 1954 (45.8) | 798 (48.4) | 1156 (44.1) | 0.085 |
| Race, n (%) |  |  |  |  |  |  |  |  |
| White | 3423 (80.1) | 1308 (79.2) | 2115 (80.7) | 0.037 | 3475 (81.4) | 1360 (82.3) | 2115 (80.7) | 0.040 |
| African American | 404 (9.5) | 149 (9) | 255 (9.7) | 0.025 | 368 (8.6) | 113 (6.9) | 255 (9.7) | 0.100 |
| Other | 379 (8.9) | 173 (10.5) | 206 (7.9) | 0.085 | 363 (8.5) | 157 (9.5) | 206 (7.9) | 0.055 |
| Unknown | 65 (1.5) | 21 (1.3) | 44 (1.7) | 0.036 | 65 (1.5) | 21 (1.2) | 44 (1.7) | 0.038 |
| Marital Status, n (%) |  |  |  |  |  |  |  |  |
| Married | 2387 (55.9) | 898 (54.4) | 1489 (56.8) | 0.049 | 2345 (54.9) | 856 (51.8) | 1489 (56.8) | 0.100 |
| Single | 1792 (42) | 714 (43.2) | 1078 (41.1) | 0.042 | 1814 (42.5) | 736 (44.6) | 1078 (41.1) | 0.070 |
| Other | 92 (2.2) | 39 (2.4) | 53 (2) | 0.022 | 111 (2.6) | 58 (3.5) | 53 (2) | 0.100 |
| Payor, n (%) |  |  |  |  |  |  |  |  |
| Commercial | 1973 (46.2) | 786 (47.6) | 1187 (45.3) | 0.046 | 1976 (46.3) | 789 (47.8) | 1187 (45.3) | 0.050 |
| Medicaid | 441 (10.3) | 184 (11.1) | 257 (9.8) | 0.042 | 440 (10.3) | 183 (11.1) | 257 (9.8) | 0.041 |
| Medicare | 1440 (33.7) | 519 (31.4) | 921 (35.2) | 0.080 | 1448 (33.9) | 527 (31.9) | 921 (35.2) | 0.070 |
| Other | 417 (9.8) | 162 (9.8) | 255 (9.7) | 0.003 | 407 (9.5) | 152 (9.2) | 255 (9.7) | 0.018 |
| Weighted Elixhauser Score, n (%) |  |  |  |  |  |  |  |  |
| <0 | 973 (22.8) | 302 (18.3) | 671 (25.6) | 0.189 | 1033 (24.2) | 362 (21.9) | 671 (25.6) | 0.096 |
| 0 and 3 | 1692 (39.6) | 734 (44.5) | 958 (36.6) | 0.159 | 1593 (37.3) | 635 (38.5) | 958 (36.6) | 0.038 |
| >3 | 1606 (37.6) | 615 (37.3) | 991 (37.8) | 0.012 | 1645 (38.5) | 654 (39.6) | 991 (37.8) | 0.037 |
| Year of Index, n (%) |  |  |  |  |  |  |  |  |
| 2015 | 158 (3.7) | 68 (4.1) | 90 (3.4) | 0.034 | 133 (3.1) | 43 (2.6) | 90 (3.4) | 0.042 |
| 2016 | 612 (14.3) | 465 (28.2) | 147 (5.6) | 0.501 | 314 (7.3) | 167 (10.1) | 147 (5.6) | 0.100 |
| 2017 | 1032 (24.2) | 710 (43) | 322 (12.3) | 0.620 | 605 (14.2) | 283 (17.1) | 322 (12.3) | 0.098 |
| 2018 | 790 (18.5) | 269 (16.3) | 521 (19.9) | 0.097 | 788 (18.5) | 267 (16.2) | 521 (19.9) | 0.100 |
| 2019 | 774 (18.1) | 79 (4.8) | 695 (26.5) | 1.018 | 1098 (25.7) | 403 (24.4) | 695 (26.5) | 0.100 |
| 2020 | 583 (13.7) | 36 (2.2) | 547 (20.9) | 1.280 | 868 (20.3) | 321 (19.4) | 547 (20.9) | 0.100 |
| 2021 | 322 (7.5) | 24 (1.5) | 298 (11.4) | 0.829 | 466 (10.9) | 168 (10.2) | 298 (11.4) | 0.100 |
| Surgical Approach, n (%) |  |  |  |  |  |  |  |  |
| MIS | 3117 (73) | 1245 (75.4) | 1872 (71.5) | 0.092 | 3123 (73.1) | 1251 (75.8) | 1872 (71.5) | 0.100 |
| Open Surgery | 1154 (27) | 406 (24.6) | 748 (28.5) | 0.092 | 1148 (26.9) | 400 (24.2) | 748 (28.5) | 0.100 |
| Admission Type, n (%) |  |  |  |  |  |  |  |  |
| Elective | 2077 (48.6) | 728 (44.1) | 1349 (51.5) | 0.149 | 2150 (50.3) | 801 (48.5) | 1349 (51.5) | 0.060 |
| Emergency | 1812 (42.4) | 854 (51.7) | 958 (36.6) | 0.303 | 1644 (38.5) | 686 (41.6) | 958 (36.6) | 0.100 |
| Urgent | 382 (8.9) | 69 (4.2) | 313 (11.9) | 0.388 | 477 (11.2) | 164 (9.9) | 313 (11.9) | 0.100 |
| Anatomy of Procedure, n (%) |  |  |  |  |  |  |  |  |
| Appendix | 1424 (33.3) | 695 (42.1) | 729 (27.8) | 0.289 | 1241 (29) | 512 (31) | 729 (27.8) | 0.064 |
| Colorectal | 1406 (32.9) | 474 (28.7) | 932 (35.6) | 0.152 | 1470 (34.4) | 538 (32.6) | 932 (35.6) | 0.065 |
| Gallbladder | 262 (6.1) | 91 (5.5) | 171 (6.5) | 0.045 | 316 (7.4) | 145 (8.8) | 171 (6.5) | 0.100 |
| Spleen | 78 (1.8) | 39 (2.4) | 39 (1.5) | 0.058 | 89 (2.1) | 50 (3) | 39 (1.5) | 0.100 |
| Stomach | 819 (19.2) | 224 (13.6) | 595 (22.7) | 0.267 | 913 (21.4) | 318 (19.3) | 595 (22.7) | 0.100 |
| Otherb | 282 (6.6) | 128 (7.8) | 154 (5.9) | 0.070 | 241 (5.7) | 87 (5.3) | 154 (5.9) | 0.022 |
| Staple Size, n (%) |  |  |  |  |  |  |  |  |
| 45 mm | 1981 (46.4) | 1029 (62.3) | 952 (36.3) | 0.536 | 1632 (38.2) | 680 (41.2) | 952 (36.3) | 0.100 |
| 60 mm | 2290 (53.6) | 622 (37.7) | 1668 (63.7) | 0.536 | 2639 (61.8) | 971 (58.8) | 1668 (63.7) | 0.100 |
| Setting of Care, n (%) |  |  |  |  |  |  |  |  |
| Inpatient | 4271 (100) | 1651 (100) | 2620 (100) | - | 4271 (100) | 1651 (100) | 2620 (100) | - |
| Outpatient | - | - | - | - | 0 (0) | 0 (0) | 0 (0) | - |
| Number Hospital Beds, n (%) |  |  |  |  |  |  |  |  |
| <200 | 759 (17.8) | 433 (26.2) | 326 (12.4) | 0.313 | 604 (14.1) | 278 (16.8) | 326 (12.4) | 0.100 |
| 200-299 | 594 (13.9) | 201 (12.2) | 393 (15) | 0.086 | 587 (13.7) | 194 (11.7) | 393 (15) | 0.100 |
| 300-499 | 1355 (31.7) | 324 (19.6) | 1031 (39.4) | 0.497 | 1615 (37.8) | 584 (35.4) | 1031 (39.4) | 0.100 |
| 500+ | 1563 (36.6) | 693 (42) | 870 (33.2) | 0.178 | 1465 (34.3) | 595 (36) | 870 (33.2) | 0.058 |
| Hospital Procedural Volume, n (%) |  |  |  |  |  |  |  |  |
| 1-999 | 1150 (26.9) | 426 (25.8) | 724 (27.6) | 0.042 | 1155 (27) | 431 (26.1) | 724 (27.6) | 0.035 |
| 1000-1999 | 1078 (25.2) | 368 (22.3) | 710 (27.1) | 0.116 | 1204 (28.2) | 494 (29.9) | 710 (27.1) | 0.068 |
| 2000-2999 | 1003 (23.5) | 264 (16) | 739 (28.2) | 0.333 | 1144 (26.8) | 405 (24.5) | 739 (28.2) | 0.100 |
| 3000+ | 1040 (24.4) | 593 (35.9) | 447 (17.1) | 0.393 | 768 (18) | 321 (19.4) | 447 (17.1) | 0.049 |
| Provider Region, n (%) |  |  |  |  |  |  |  |  |
| Midwest | 353 (8.3) | 87 (5.3) | 266 (10.2) | 0.219 | 421 (9.9) | 155 (9.4) | 266 (10.2) | 0.035 |
| Northeast | 471 (11) | 179 (10.8) | 292 (11.1) | 0.010 | 425 (9.9) | 133 (8) | 292 (11.1) | 0.100 |
| South | 2855 (66.8) | 1147 (69.5) | 1708 (65.2) | 0.093 | 2800 (65.6) | 1092 (66.1) | 1708 (65.2) | 0.020 |
| West | 592 (13.9) | 238 (14.4) | 354 (13.5) | 0.026 | 626 (14.7) | 272 (16.5) | 354 (13.5) | 0.084 |
| Urban vs. Rural Hospital Location, n (%) |  |  |  |  |  |  |  |  |
| Rural | 941 (22) | 262 (15.9) | 679 (25.9) | 0.275 | 1112 (26) | 433 (26.2) | 679 (25.9) | 0.008 |
| Urban | 3330 (78) | 1389 (84.1) | 1941 (74.1) | 0.275 | 3159 (74) | 1218 (73.8) | 1941 (74.1) | 0.008 |
| Procedural Physician Specialty, n (%) |  |  |  |  |  |  |  |  |
| General Surgery | 3676 (86.1) | 1359 (82.3) | 2317 (88.4) | 0.160 | 3714 (87) | 1397 (84.6) | 2317 (88.4) | 0.100 |
| Other | 595 (13.9) | 292 (17.7) | 303 (11.6) | 0.160 | 557 (13) | 254 (15.4) | 303 (11.6) | 0.100 |
| Hospital Teaching Status, n (%) |  |  |  |  |  |  |  |  |
| Teaching | 1893 (44.3) | 678 (41.1) | 1215 (46.4) | 0.108 | 1899 (44.5) | 684 (41.5) | 1215 (46.4) | 0.100 |
| Non-teaching | 2378 (55.7) | 973 (58.9) | 1405 (53.6) | 0.108 | 2372 (55.5) | 967 (58.5) | 1405 (53.6) | 0.100 |

GST: Gripping Surface Technology; SMD: standardized mean difference; SD: standard deviation; MIS: minimally-invasive surgery

a Covariate balancing performed using stable balance weights permitting a maximum SMD of 0.10 of covariates between study comparison groups

b Includes the following types of general surgery: abdominal wall, hernia, pancreas, and liver

## Supplemental Appendix B, Table 2. Patient, hospital, provider, and procedure characteristics of the general surgery cohort with a valid operating room time

|  | **Prior to Covariate Balancing** | | | | **After Covariate Balancinga** | | | |
| --- | --- | --- | --- | --- | --- | --- | --- | --- |
| **Covariate** | **Overall** | **Standard Reload** | **GST Reload** | **SMD** | **Overall** | **Standard Reload** | **GST Reload** | **SMD** |
| N | 4071 | 1621 | 2450 |  | 4071 | 1621 | 2450 |  |
| Age, mean (SD) | 54.4 (17.1) | 53.5 (17.4) | 55 (16.9) | 0.086 | 55.1 (17) | 55.2 (17.1) | 55 (16.9) | 0.012 |
| Age category, years, n (%) |  |  |  |  |  |  |  |  |
| 18-34 | 640 (15.7) | 292 (18) | 348 (14.2) | 0.099 | 598 (14.7) | 250 (15.4) | 348 (14.2) | 0.031 |
| 35-44 | 519 (12.7) | 186 (11.5) | 333 (13.6) | 0.066 | 513 (12.6) | 180 (11.1) | 333 (13.6) | 0.079 |
| 45-54 | 746 (18.3) | 292 (18) | 454 (18.5) | 0.013 | 744 (18.3) | 290 (17.9) | 454 (18.5) | 0.017 |
| 55-64 | 916 (22.5) | 385 (23.8) | 531 (21.7) | 0.049 | 930 (22.8) | 399 (24.6) | 531 (21.7) | 0.068 |
| 65+ | 1250 (30.7) | 466 (28.7) | 784 (32) | 0.072 | 1287 (31.6) | 503 (31) | 784 (32) | 0.021 |
| Sex, n (%) |  |  |  |  |  |  |  |  |
| Female | 2234 (54.9) | 856 (52.8) | 1378 (56.2) | 0.069 | 2231 (54.8) | 853 (52.6) | 1378 (56.2) | 0.073 |
| Male | 1837 (45.1) | 765 (47.2) | 1072 (43.8) | 0.069 | 1840 (45.2) | 768 (47.4) | 1072 (43.8) | 0.073 |
| Race, n (%) |  |  |  |  |  |  |  |  |
| White | 3259 (80.1) | 1300 (80.2) | 1959 (80) | 0.006 | 3285 (80.7) | 1326 (81.8) | 1959 (80) | 0.046 |
| African American | 376 (9.2) | 136 (8.4) | 240 (9.8) | 0.051 | 354 (8.7) | 114 (7) | 240 (9.8) | 0.100 |
| Other | 381 (9.4) | 170 (10.5) | 211 (8.6) | 0.061 | 381 (9.4) | 170 (10.5) | 211 (8.6) | 0.062 |
| Unknown | 55 (1.4) | 15 (0.9) | 40 (1.6) | 0.074 | 51 (1.3) | 11 (0.7) | 40 (1.6) | 0.100 |
| Marital Status, n (%) |  |  |  |  |  |  |  |  |
| Married | 2286 (56.2) | 895 (55.2) | 1391 (56.8) | 0.031 | 2231 (54.8) | 840 (51.8) | 1391 (56.8) | 0.100 |
| Single | 1704 (41.9) | 690 (42.6) | 1014 (41.4) | 0.024 | 1742 (42.8) | 728 (44.9) | 1014 (41.4) | 0.071 |
| Other | 81 (2) | 36 (2.2) | 45 (1.8) | 0.026 | 99 (2.4) | 54 (3.3) | 45 (1.8) | 0.100 |
| Payor, n (%) |  |  |  |  |  |  |  |  |
| Commercial | 1932 (47.5) | 803 (49.5) | 1129 (46.1) | 0.069 | 1907 (46.8) | 778 (48) | 1129 (46.1) | 0.039 |
| Medicaid | 437 (10.7) | 196 (12.1) | 241 (9.8) | 0.069 | 440 (10.8) | 199 (12.3) | 241 (9.8) | 0.074 |
| Medicare | 1310 (32.2) | 471 (29.1) | 839 (34.2) | 0.114 | 1341 (32.9) | 502 (31) | 839 (34.2) | 0.072 |
| Other | 392 (9.6) | 151 (9.3) | 241 (9.8) | 0.018 | 383 (9.4) | 142 (8.8) | 241 (9.8) | 0.037 |
| Weighted Elixhauser Score, n (%) |  |  |  |  |  |  |  |  |
| <0 | 916 (22.5) | 289 (17.8) | 627 (25.6) | 0.203 | 1013 (24.9) | 386 (23.8) | 627 (25.6) | 0.047 |
| 0 and 3 | 1687 (41.4) | 769 (47.4) | 918 (37.5) | 0.200 | 1544 (37.9) | 626 (38.6) | 918 (37.5) | 0.024 |
| >3 | 1468 (36.1) | 563 (34.7) | 905 (36.9) | 0.046 | 1514 (37.2) | 609 (37.6) | 905 (36.9) | 0.013 |
| Year of Index, n (%) |  |  |  |  |  |  |  |  |
| 2015 | 172 (4.2) | 77 (4.8) | 95 (3.9) | 0.041 | 137 (3.4) | 42 (2.6) | 95 (3.9) | 0.061 |
| 2016 | 617 (15.2) | 478 (29.5) | 139 (5.7) | 0.522 | 305 (7.5) | 166 (10.2) | 139 (5.7) | 0.100 |
| 2017 | 969 (23.8) | 689 (42.5) | 280 (11.4) | 0.628 | 545 (13.4) | 265 (16.4) | 280 (11.4) | 0.100 |
| 2018 | 735 (18.1) | 248 (15.3) | 487 (19.9) | 0.127 | 751 (18.4) | 264 (16.3) | 487 (19.9) | 0.100 |
| 2019 | 734 (18) | 79 (4.9) | 655 (26.7) | 1.015 | 1053 (25.9) | 398 (24.6) | 655 (26.7) | 0.100 |
| 2020 | 545 (13.4) | 31 (1.9) | 514 (21) | 1.392 | 832 (20.4) | 318 (19.6) | 514 (21) | 0.100 |
| 2021 | 299 (7.3) | 19 (1.2) | 280 (11.4) | 0.953 | 448 (11) | 168 (10.4) | 280 (11.4) | 0.100 |
| Surgical Approach, n (%) |  |  |  |  |  |  |  |  |
| MIS | 2997 (73.6) | 1241 (76.6) | 1756 (71.7) | 0.115 | 2987 (73.4) | 1231 (75.9) | 1756 (71.7) | 0.100 |
| Open Surgery | 1074 (26.4) | 380 (23.4) | 694 (28.3) | 0.115 | 1084 (26.6) | 390 (24.1) | 694 (28.3) | 0.100 |
| Admission Type, n (%) |  |  |  |  |  |  |  |  |
| Elective | 2038 (50.1) | 725 (44.7) | 1313 (53.6) | 0.178 | 2130 (52.3) | 817 (50.4) | 1313 (53.6) | 0.064 |
| Emergency | 1758 (43.2) | 840 (51.8) | 918 (37.5) | 0.287 | 1606 (39.5) | 688 (42.5) | 918 (37.5) | 0.100 |
| Urgent | 275 (6.8) | 56 (3.5) | 219 (8.9) | 0.300 | 334 (8.2) | 115 (7.1) | 219 (8.9) | 0.100 |
| Anatomy of Procedure, n (%) |  |  |  |  |  |  |  |  |
| Appendix | 1379 (33.9) | 706 (43.6) | 673 (27.5) | 0.324 | 1168 (28.7) | 495 (30.5) | 673 (27.5) | 0.062 |
| Colorectal | 1322 (32.5) | 454 (28) | 868 (35.4) | 0.165 | 1401 (34.4) | 533 (32.9) | 868 (35.4) | 0.057 |
| Gallbladder | 240 (5.9) | 84 (5.2) | 156 (6.4) | 0.054 | 295 (7.3) | 139 (8.6) | 156 (6.4) | 0.100 |
| Spleen | 73 (1.8) | 38 (2.3) | 35 (1.4) | 0.061 | 83 (2) | 48 (2.9) | 35 (1.4) | 0.100 |
| Stomach | 777 (19.1) | 215 (13.3) | 562 (22.9) | 0.285 | 879 (21.6) | 317 (19.5) | 562 (22.9) | 0.100 |
| Otherb | 280 (6.9) | 124 (7.6) | 156 (6.4) | 0.048 | 245 (6) | 89 (5.5) | 156 (6.4) | 0.033 |
| Staple Size, n (%) |  |  |  |  |  |  |  |  |
| 45 mm | 1854 (45.5) | 1028 (63.4) | 826 (33.7) | 0.617 | 1451 (35.6) | 625 (38.5) | 826 (33.7) | 0.100 |
| 60 mm | 2217 (54.5) | 593 (36.6) | 1624 (66.3) | 0.617 | 2620 (64.4) | 996 (61.5) | 1624 (66.3) | 0.100 |
| Setting of Care, n (%) |  |  |  |  |  |  |  |  |
| Inpatient | 3824 (93.9) | 1495 (92.2) | 2329 (95.1) | 0.106 | 3872 (95.1) | 1543 (95.2) | 2329 (95.1) | 0.004 |
| Outpatient | 247 (6.1) | 126 (7.8) | 121 (4.9) | 0.106 | 199 (4.9) | 78 (4.8) | 121 (4.9) | 0.004 |
| Number Hospital Beds, n (%) |  |  |  |  |  |  |  |  |
| <200 | 768 (18.9) | 478 (29.5) | 290 (11.8) | 0.387 | 556 (13.7) | 266 (16.4) | 290 (11.8) | 0.100 |
| 200-299 | 644 (15.8) | 196 (12.1) | 448 (18.3) | 0.190 | 692 (17) | 244 (15) | 448 (18.3) | 0.100 |
| 300-499 | 1194 (29.3) | 296 (18.3) | 898 (36.7) | 0.476 | 1430 (35.1) | 532 (32.8) | 898 (36.7) | 0.100 |
| 500+ | 1465 (36) | 651 (40.2) | 814 (33.2) | 0.141 | 1394 (34.2) | 580 (35.8) | 814 (33.2) | 0.052 |
| Hospital Procedural Volume, n (%) |  |  |  |  |  |  |  |  |
| 1-999 | 1030 (25.3) | 371 (22.9) | 659 (26.9) | 0.095 | 1061 (26.1) | 402 (24.8) | 659 (26.9) | 0.050 |
| 1000-1999 | 996 (24.5) | 339 (20.9) | 657 (26.8) | 0.145 | 1126 (27.6) | 469 (28.9) | 657 (26.8) | 0.051 |
| 2000-2999 | 970 (23.8) | 259 (16) | 711 (29) | 0.356 | 1122 (27.6) | 411 (25.4) | 711 (29) | 0.100 |
| 3000+ | 1075 (26.4) | 652 (40.2) | 423 (17.3) | 0.468 | 762 (18.7) | 339 (20.9) | 423 (17.3) | 0.075 |
| Provider Region, n (%) |  |  |  |  |  |  |  |  |
| Midwest | 310 (7.6) | 80 (4.9) | 230 (9.4) | 0.206 | 347 (8.5) | 117 (7.2) | 230 (9.4) | 0.100 |
| Northeast | 540 (13.3) | 178 (11) | 362 (14.8) | 0.121 | 551 (13.5) | 189 (11.6) | 362 (14.8) | 0.100 |
| South | 2551 (62.7) | 1037 (64) | 1514 (61.8) | 0.045 | 2549 (62.6) | 1035 (63.9) | 1514 (61.8) | 0.043 |
| West | 670 (16.5) | 326 (20.1) | 344 (14) | 0.151 | 624 (15.3) | 280 (17.3) | 344 (14) | 0.081 |
| Urban vs. Rural Hospital Location, n (%) |  |  |  |  |  |  |  |  |
| Rural | 808 (19.8) | 238 (14.7) | 570 (23.3) | 0.242 | 1005 (24.7) | 435 (26.8) | 570 (23.3) | 0.100 |
| Urban | 3263 (80.2) | 1383 (85.3) | 1880 (76.7) | 0.242 | 3066 (75.3) | 1186 (73.2) | 1880 (76.7) | 0.100 |
| Procedural Physician Specialty, n (%) |  |  |  |  |  |  |  |  |
| General Surgery | 3516 (86.4) | 1322 (81.6) | 2194 (89.6) | 0.206 | 3584 (88) | 1390 (85.7) | 2194 (89.6) | 0.099 |
| Other | 555 (13.6) | 299 (18.4) | 256 (10.4) | 0.206 | 487 (12) | 231 (14.3) | 256 (10.4) | 0.099 |
| Hospital Teaching Status, n (%) |  |  |  |  |  |  |  |  |
| Teaching | 1844 (45.3) | 631 (38.9) | 1213 (49.5) | 0.217 | 1936 (47.6) | 723 (44.6) | 1213 (49.5) | 0.100 |
| Non-teaching | 2227 (54.7) | 990 (61.1) | 1237 (50.5) | 0.217 | 2135 (52.4) | 898 (55.4) | 1237 (50.5) | 0.100 |

GST: Gripping Surface Technology; SMD: standardized mean difference; SD: standard deviation; MIS: minimally-invasive surgery

a Covariate balancing performed using stable balance weights permitting a maximum SMD of 0.10 of covariates between study comparison groups

b Includes the following types of general surgery: abdominal wall, hernia, pancreas, and liver

# Supplemental Appendix C

## Supplemental Appendix C, Table 1. Patient, hospital, provider, and procedure characteristics of the thoracic surgery cohort with a valid operating room time

|  | **Prior to Covariate Balancing** | | | | **After Covariate Balancinga** | | | |
| --- | --- | --- | --- | --- | --- | --- | --- | --- |
| **Covariate** | **Overall** | **Standard Reload** | **GST Reload** | **SMD** | **Overall** | **Standard Reload** | **GST Reload** | **SMD** |
| N | 739 | 265 | 474 |  | 739 | 265 | 474 |  |
| Age, mean (SD) | 62.7 (13.1) | 62.3 (14.2) | 62.9 (12.5) | 0.039 | 62.5 (12.1) | 61.9 (11.3) | 62.9 (12.5) | 0.066 |
| Age category, years, n (%) |  |  |  |  |  |  |  |  |
| 18-34 | 32 (4.3) | 14 (5.3) | 18 (3.8) | 0.066 | 23 (3.1) | 5 (1.8) | 18 (3.8) | 0.089 |
| 35-44 | 38 (5.1) | 16 (6) | 22 (4.6) | 0.059 | 33 (4.4) | 11 (4) | 22 (4.6) | 0.025 |
| 45-54 | 83 (11.2) | 33 (12.5) | 50 (10.5) | 0.058 | 87 (11.7) | 37 (13.9) | 50 (10.5) | 0.100 |
| 55-64 | 221 (29.9) | 68 (25.7) | 153 (32.3) | 0.151 | 240 (32.4) | 87 (32.7) | 153 (32.3) | 0.009 |
| 65+ | 365 (49.4) | 134 (50.6) | 231 (48.7) | 0.037 | 357 (48.3) | 126 (47.6) | 231 (48.7) | 0.022 |
| Sex, n (%) |  |  |  |  |  |  |  |  |
| Female | 364 (49.3) | 128 (48.3) | 236 (49.8) | 0.030 | 379 (51.3) | 143 (54.1) | 236 (49.8) | 0.086 |
| Male | 375 (50.7) | 137 (51.7) | 238 (50.2) | 0.030 | 360 (48.7) | 122 (45.9) | 238 (50.2) | 0.086 |
| Race, n (%) |  |  |  |  |  |  |  |  |
| White | 662 (89.6) | 220 (83) | 442 (93.2) | 0.272 | 689 (93.2) | 247 (93.2) | 442 (93.2) | 0.002 |
| African American | 44 (6) | 22 (8.3) | 22 (4.6) | 0.132 | 27 (3.7) | 5 (1.9) | 22 (4.6) | 0.100 |
| Other | 33 (4.5) | 23 (8.7) | 10 (2.1) | 0.233 | 23 (3.1) | 13 (4.9) | 10 (2.1) | 0.100 |
| Marital Status, n (%) |  |  |  |  |  |  |  |  |
| Married | 420 (56.8) | 154 (58.1) | 266 (56.1) | 0.040 | 428 (57.9) | 162 (61.1) | 266 (56.1) | 0.100 |
| Single | 319 (43.2) | 111 (41.9) | 208 (43.9) | 0.040 | 311 (42.1) | 103 (38.9) | 208 (43.9) | 0.100 |
| Payor, n (%) |  |  |  |  |  |  |  |  |
| Commercial | 215 (29.1) | 82 (30.9) | 133 (28.1) | 0.062 | 212 (28.6) | 79 (29.6) | 133 (28.1) | 0.034 |
| Medicaid | 84 (11.4) | 24 (9.1) | 60 (12.7) | 0.125 | 86 (11.6) | 26 (9.8) | 60 (12.7) | 0.100 |
| Medicare | 420 (56.8) | 147 (55.5) | 273 (57.6) | 0.043 | 425 (57.5) | 152 (57.4) | 273 (57.6) | 0.003 |
| Other | 20 (2.7) | 12 (4.5) | 8 (1.7) | 0.136 | 16 (2.2) | 8 (3.1) | 8 (1.7) | 0.069 |
| Weighted Elixhauser Score, n (%) |  |  |  |  |  |  |  |  |
| <4 | 240 (32.5) | 102 (38.5) | 138 (29.1) | 0.192 | 217 (29.4) | 79 (29.9) | 138 (29.1) | 0.017 |
| 4 and 7 | 213 (28.8) | 68 (25.7) | 145 (30.6) | 0.113 | 237 (32) | 92 (34.6) | 145 (30.6) | 0.091 |
| >7 | 286 (38.7) | 95 (35.8) | 191 (40.3) | 0.093 | 285 (38.6) | 94 (35.5) | 191 (40.3) | 0.100 |
| Year of Index, n (%) |  |  |  |  |  |  |  |  |
| 2015 | 23 (3.1) | 11 (4.2) | 12 (2.5) | 0.081 | 15 (2) | 3 (1.1) | 12 (2.5) | 0.074 |
| 2016 | 204 (27.6) | 140 (52.8) | 64 (13.5) | 0.786 | 113 (15.3) | 49 (18.5) | 64 (13.5) | 0.100 |
| 2017 | 165 (22.3) | 49 (18.5) | 116 (24.5) | 0.154 | 174 (23.5) | 58 (21.9) | 116 (24.5) | 0.066 |
| 2018 | 166 (22.5) | 45 (17) | 121 (25.5) | 0.227 | 199 (26.9) | 78 (29.3) | 121 (25.5) | 0.100 |
| 2019 | 93 (12.6) | 7 (2.6) | 86 (18.1) | 0.965 | 130 (17.6) | 44 (16.5) | 86 (18.1) | 0.100 |
| 2020 | 57 (7.7) | 7 (2.6) | 50 (10.5) | 0.492 | 74 (10) | 24 (8.9) | 50 (10.5) | 0.100 |
| 2021 | 31 (4.2) | 6 (2.3) | 25 (5.3) | 0.202 | 35 (4.7) | 10 (3.8) | 25 (5.3) | 0.100 |
| Surgical Approach, n (%) |  |  |  |  |  |  |  |  |
| MIS | 411 (55.6) | 189 (71.3) | 222 (46.8) | 0.540 | 352 (47.6) | 130 (49) | 222 (46.8) | 0.048 |
| Open Surgery | 328 (44.4) | 76 (28.7) | 252 (53.2) | 0.540 | 387 (52.4) | 135 (51) | 252 (53.2) | 0.048 |
| Admission Type, n (%) |  |  |  |  |  |  |  |  |
| Elective | 579 (78.3) | 192 (72.5) | 387 (81.6) | 0.205 | 599 (81) | 212 (79.9) | 387 (81.6) | 0.039 |
| Emergency | 123 (16.6) | 57 (21.5) | 66 (13.9) | 0.184 | 114 (15.4) | 48 (18) | 66 (13.9) | 0.100 |
| Urgent | 37 (5) | 16 (6) | 21 (4.4) | 0.067 | 26 (3.6) | 5 (2) | 21 (4.4) | 0.100 |
| Anatomy of Procedure, n (%) |  |  |  |  |  |  |  |  |
| Lung | 609 (82.4) | 217 (81.9) | 392 (82.7) | 0.021 | 621 (84.1) | 229 (86.6) | 392 (82.7) | 0.100 |
| Otherb | 130 (17.6) | 48 (18.1) | 82 (17.3) | 0.021 | 118 (15.9) | 36 (13.4) | 82 (17.3) | 0.100 |
| Staple Size, n (%) |  |  |  |  |  |  |  |  |
| 45 mm | 101 (13.7) | 61 (23) | 40 (8.4) | 0.346 | 74 (10) | 34 (12.7) | 40 (8.4) | 0.100 |
| 60 mm | 638 (86.3) | 204 (77) | 434 (91.6) | 0.346 | 665 (90) | 231 (87.3) | 434 (91.6) | 0.100 |
| Setting of Care, n (%) |  |  |  |  |  |  |  |  |
| Inpatient | 739 (100) | 265 (100) | 474 (100) | - | 739 (100) | 265 (100) | 474 (100) | - |
| Outpatient | - | - | - | - | - | - | - | - |
| Number Hospital Beds, n (%) |  |  |  |  |  |  |  |  |
| <400 | 277 (37.5) | 185 (69.8) | 92 (19.4) | 1.096 | 144 (19.5) | 52 (19.5) | 92 (19.4) | 0.003 |
| 400-499 | 367 (49.7) | 35 (13.2) | 332 (70) | 1.676 | 509 (68.8) | 177 (66.7) | 332 (70) | 0.100 |
| 500+ | 95 (12.9) | 45 (17) | 50 (10.5) | 0.171 | 87 (11.7) | 37 (13.8) | 50 (10.5) | 0.087 |
| Hospital Procedural Volume, n (%) |  |  |  |  |  |  |  |  |
| 1-1999 | 227 (30.7) | 146 (55.1) | 81 (17.1) | 0.763 | 127 (17.2) | 46 (17.3) | 81 (17.1) | 0.005 |
| 2000-3199 | 333 (45.1) | 64 (24.2) | 269 (56.8) | 0.760 | 408 (55.2) | 139 (52.5) | 269 (56.8) | 0.100 |
| 3200+ | 179 (24.2) | 55 (20.8) | 124 (26.2) | 0.133 | 204 (27.6) | 80 (30.2) | 124 (26.2) | 0.100 |
| Provider Region, n (%) |  |  |  |  |  |  |  |  |
| Midwest | 13 (1.8) | 6 (2.3) | 7 (1.5) | 0.053 | 7 (0.9) | 0 (0) | 7 (1.5) | 0.099 |
| Northeast | 16 (2.2) | 5 (1.9) | 11 (2.3) | 0.032 | 14 (1.9) | 3 (1.1) | 11 (2.3) | 0.093 |
| South | 526 (71.2) | 142 (53.6) | 384 (81) | 0.549 | 609 (82.4) | 225 (84.9) | 384 (81) | 0.079 |
| West | 184 (24.9) | 112 (42.3) | 72 (15.2) | 0.547 | 109 (14.8) | 37 (14) | 72 (15.2) | 0.024 |
| Urban vs. Rural Hospital Location, n (%) |  |  |  |  |  |  |  |  |
| Rural | 187 (25.3) | 113 (42.6) | 74 (15.6) | 0.546 | 111 (15) | 37 (14) | 74 (15.6) | 0.032 |
| Urban | 552 (74.7) | 152 (57.4) | 400 (84.4) | 0.546 | 628 (85) | 228 (86) | 400 (84.4) | 0.032 |
| Procedural Physician Specialty, n (%) |  |  |  |  |  |  |  |  |
| Thoracic Surgery | 439 (59.4) | 77 (29.1) | 362 (76.4) | 1.040 | 552 (74.7) | 190 (71.8) | 362 (76.4) | 0.100 |
| Other | 300 (40.6) | 188 (70.9) | 112 (23.6) | 1.040 | 187 (25.3) | 75 (28.2) | 112 (23.6) | 0.100 |
| Hospital Teaching Status, n (%) |  |  |  |  |  |  |  |  |
| Teaching | 283 (38.3) | 153 (57.7) | 130 (27.4) | 0.612 | 201 (27.2) | 71 (26.8) | 130 (27.4) | 0.012 |
| Non-teaching | 456 (61.7) | 112 (42.3) | 344 (72.6) | 0.612 | 538 (72.8) | 194 (73.2) | 344 (72.6) | 0.012 |

GST: Gripping Surface Technology; SMD: standardized mean difference; SD: standard deviation; MIS: minimally-invasive surgery

a Covariate balancing performed using stable balance weights permitting a maximum SMD of 0.10 of covariates between study comparison groups

b Includes the following types of thoracic surgery: heart, thymus/adrenal glands, and diaphragm
